# Supplementary material for: Adherence to healthy diet and risk of cardiovascular disease in adult survivors of childhood cancer in the St. Jude Lifetime Cohort: a cross-sectional study
Source: Springer Nature journal article supplement (doi:10.1186/s12916-023-02956-x), 2023-07-03
Supplement: MOESM1 [file 25568360]

Table S1. Components and standards for scoring for Dietary Approaches to Stop Hypertension (DASH), Healthy Eating Index (HEI)-2015, and Alternate Mediterranean diet (aMED)<sup>1</sup>

| Component                | HEI-2015  |                            |                            | DASH      |                            |                            | Component               | Criteria for 1 point           |
|--------------------------|-----------|----------------------------|----------------------------|-----------|----------------------------|----------------------------|-------------------------|--------------------------------|
|                          | Max Score | Standard for Maximum Score | Standard for Minimum Score | Max Score | Standard for Maximum Score | Standard for Minimum Score |                         |                                |
| Total grains             | -         | -                          | -                          | 5         | ≥6 servings/d              | 0 serving/d                | -                       | -                              |
| Whole grains             | 10        | ≥1.5 oz equiv.             | 0 oz equiv.                | 5         | ≥50% of daily total        | 0% of daily total          | Whole grains            | > median intake                |
| Refined grains           | 10        | ≤1.8 oz equiv.             | ≥4.3 oz equiv.             | -         | -                          | -                          | -                       | -                              |
| Total vegetables         | 5         | ≥1.1 cup equiv.            | 0 cup equiv.               | 10        | ≥4 servings/d              | 0 serving/d                | Vegetables <sup>2</sup> | > median intake                |
| Greens and beans         | 5         | ≥0.2 cup equiv.            | 0 cup equiv.               | -         | -                          | -                          | -                       | -                              |
| Total fruits             | 5         | ≥0.8 cup equiv.            | 0 cup equiv.               | 10        | ≥4 servings/d              | 0 serving/d                | Fruit                   | > median intake                |
| Whole fruits             | 5         | ≥0.4 cup equiv.            | 0 cup equiv.               | -         | -                          | -                          | -                       | -                              |
| Total dairy              | 10        | ≥1.3 cup equiv.            | 0 cup equiv.               | 5         | ≥2 servings/d              | 0 serving/d                | -                       | -                              |
| Low-fat dairy            | -         | -                          | -                          | 5         | ≥75% of daily total        | 0% of daily total          | -                       | -                              |
| Total protein foods      | 5         | ≥2.5 oz equiv.             | 0 oz equiv.                | -         | -                          | -                          | -                       | -                              |
| Seafood & plant proteins | 5         | ≥0.8 oz equiv.             | 0 oz equiv.                | -         | -                          | -                          | Fish                    | > median intake                |
| Nuts-seeds-legumes       | -         | -                          | -                          | 10        | ≥4 servings/wk             | 0 serving/wk               | Nuts                    | > median intake                |
| Fats-oils                | -         | -                          | -                          | 10        | ≤3 servings/d              | ≥6 serving/d               | Legumes                 | > median intake                |
| Fatty acids ratio        | 10        | (PUFAs + MUFAs) /SFAs ≥2.5 | (PUFAs + MUFAs) /SFAs ≤1.2 | -         | -                          | -                          | MUFAs/SFAs              | > median value                 |
| Meat-poultry-fish-eggs   | -         | -                          | -                          | 10        | ≤2 servings/d              | ≥4 serving/d               | Red and processed meats | < median intake                |
| Saturated fats           | 10        | ≤8% of energy              | ≥16% of energy             | -         | -                          | -                          | -                       | -                              |
| Sweets                   | -         | -                          | -                          | 10        | ≤5 servings/wk             | ≥10 serving/wk             | Alcohol                 | 5-15g in women<br>5-30g in men |
| Added sugars             | 10        | ≤6.5% of energy            | ≥26% of energy             | -         | -                          | -                          | -                       | -                              |
| Sodium                   | 10        | ≤1.1 gram                  | ≥2.0 grams                 | -         | -                          | -                          | -                       | -                              |

---

Total score

100

80

9

---

1. Based on energy-adjusted intake. Intakes between the minimum and maximum standards are scored proportionately.

2. Excluding potatoes.

Figure S1. Radar plot showing the mean percentage of each component score received in men and women

A. HEI-2015

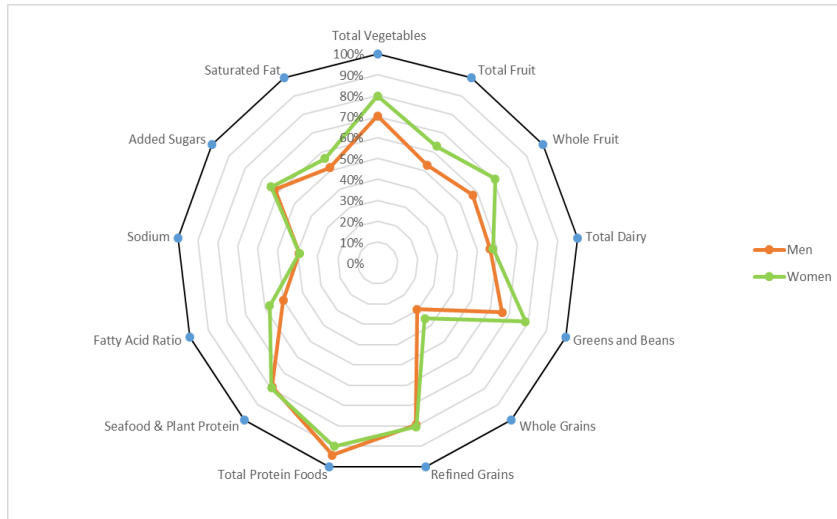

B. DASH

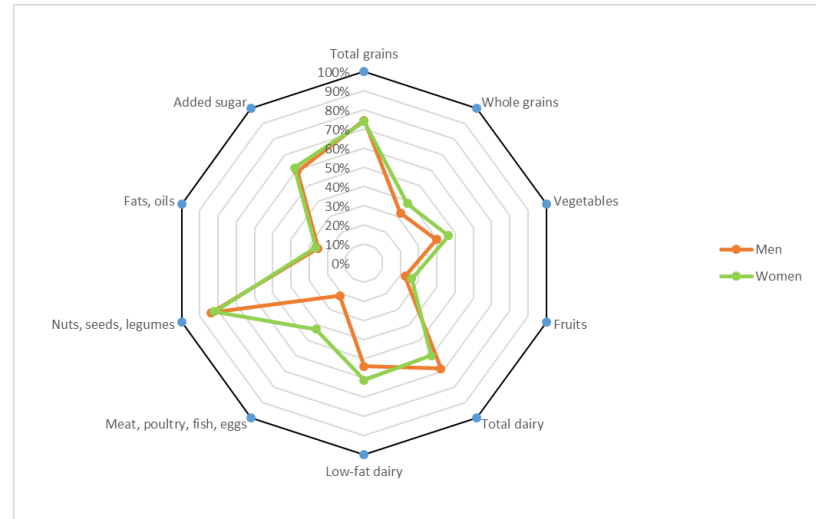

Table S2. Characteristics of childhood cancer survivors by cardiovascular disease (CVD) status in the St. Jude Lifetime Cohort Study.

|                                        | Men                 |                | P value | Women               |                | P value |
|----------------------------------------|---------------------|----------------|---------|---------------------|----------------|---------|
|                                        | No CVD<br>(n=1,559) | CVD<br>(n=323) |         | No CVD<br>(n=1,430) | CVD<br>(n=213) |         |
| HEI-2015 (mean)                        | 57.9                | 57.4           | 0.43    | 62.3                | 61.2           | 0.16    |
| DASH (mean)                            | 36.8                | 36.2           | 0.27    | 40.4                | 39.1           | 0.07    |
| aMED (mean)                            | 4.3                 | 4.2            | 0.42    | 4.2                 | 4.0            | 0.11    |
| Age, years (mean)                      | 30.1                | 33.0           | <0.001  | 29.7                | 33.0           | <0.001  |
| Race/Ethnicity (%)                     |                     |                |         |                     |                |         |
| White-non-Hispanic                     | 84.1                | 80.5           | 0.02    | 80.1                | 82.6           | 0.47    |
| Black-non-Hispanic                     | 11.2                | 16.4           |         | 15.4                | 14.6           |         |
| Others                                 | 4.7                 | 3.1            |         | 4.5                 | 2.8            |         |
| Education <sup>1</sup> (%)             |                     |                |         |                     |                |         |
| Less than high school                  | 9.3                 | 12.1           | 0.41    | 7.1                 | 8.9            | 0.42    |
| High school graduate.                  | 20.3                | 17.6           |         | 16.0                | 19.7           |         |
| Training after high school             | 32.6                | 34.1           |         | 32.9                | 32.4           |         |
| College or post-graduate               | 28.3                | 25.4           |         | 35.9                | 33.3           |         |
| Other                                  | 3.0                 | 4.0            |         | 2.9                 | 2.8            |         |
| Smoking (%)                            |                     |                |         |                     |                |         |
| Never                                  | 66.2                | 62.2           | 0.36    | 73.1                | 70.9           | 0.38    |
| Former                                 | 9.4                 | 9.3            |         | 4.3                 | 7.0            |         |
| Current                                | 14.8                | 15.8           |         | 15.1                | 14.6           |         |
| Alcohol, drinks/day (%)                |                     |                |         |                     |                |         |
| 0                                      | 20.8                | 23.8           | 0.57    | 20.6                | 23.0           | 0.86    |
| <0.5                                   | 43.9                | 44.0           |         | 56.2                | 56.3           |         |
| 0.5 - <1                               | 11.1                | 10.8           |         | 11.6                | 9.9            |         |
| 1 - <2                                 | 12.8                | 9.9            |         | 6.6                 | 5.6            |         |
| 2+                                     | 11.4                | 11.5           |         | 5.0                 | 5.2            |         |
| Body mass index, kg/m <sup>2</sup> (%) |                     |                |         |                     |                |         |
| <18.5                                  | 2.1                 | 4.6            | 0.06    | 4.8                 | 6.1            | 0.69    |
| 18.5 - <25                             | 31.2                | 31.6           |         | 38.0                | 37.6           |         |
| 25 - <30                               | 32.9                | 30.3           |         | 24.0                | 21.1           |         |
| 30+                                    | 33.7                | 33.4           |         | 33.2                | 35.2           |         |
| No physical activities (%)             | 14.4                | 24.1           | <0.001  | 18.0                | 26.3           | 0.004   |
| Multivitamin use (%)                   | 23.0                | 30.7           | 0.003   | 26.0                | 27.7           | 0.60    |
| Single supplement use (%)              | 34.9                | 42.1           | 0.01    | 39.7                | 49.3           | 0.01    |
| Hypertension (%)                       | 7.5                 | 15.8           | <0.001  | 8.7                 | 15.0           | 0.004   |
| High cholesterol (%)                   | 4.9                 | 11.8           | <0.001  | 4.2                 | 9.4            | 0.001   |
| Diabetes (%)                           | 3.0                 | 3.7            | 0.47    | 3.6                 | 1.9            | 0.19    |
| Cancer treatment                       |                     |                |         |                     |                |         |
| Chest radiation (%)                    | 22.1                | 35.6           | <0.001  | 21.0                | 35.7           | <0.001  |
| Alkylating agent (%)                   | 62.9                | 71.5           | 0.003   | 59.0                | 68.5           | 0.008   |
| Anthracycline (%)                      | 57.3                | 61.0           | 0.27    | 57.0                | 61.0           | 0.27    |

|                               |        |        |        |        |        |       |
|-------------------------------|--------|--------|--------|--------|--------|-------|
| Platinum (%)                  | 12.8   | 20.1   | <0.001 | 12.7   | 18.8   | 0.01  |
| Cancer group (%)              |        |        |        |        |        |       |
| Central nervous system tumors | 15.7   | 13.9   | <0.001 | 11.5   | 13.1   | 0.002 |
| Leukemia                      | 35.7   | 25.4   |        | 38.3   | 25.4   |       |
| Lymphoma                      | 18.7   | 27.6   |        | 15.5   | 23.5   |       |
| Other                         | 25.7   | 27.6   |        | 27.2   | 31.0   |       |
| Wilms tumor                   | 4.3    | 5.6    |        | 7.6    | 7.0    |       |
| Nutrient intake               |        |        |        |        |        |       |
| Total fat (% of total energy) | 36.6   | 37.1   | 0.09   | 36.3   | 37.1   | 0.06  |
| Vitamin C (mg/1,000 kcal)     | 95.4   | 106.2  | 0.25   | 137.7  | 144.0  | 0.72  |
| Dietary fiber (g/1,000 kcal)  | 7.7    | 7.5    | 0.28   | 9.3    | 8.8    | 0.06  |
| Calcium (g/1,000 kcal)        | 422.6  | 420.9  | 0.83   | 452.0  | 429.5  | 0.05  |
| Total sugar (g/1,000 kcal)    | 58.7   | 58.7   | 0.99   | 61.0   | 59.7   | 0.40  |
| Sodium (mg/1,000 kcal)        | 1652.9 | 1668.0 | 0.33   | 1661.6 | 1644.4 | 0.37  |
| Potassium (mg/1,000 kcal)     | 1254.0 | 1252.0 | 0.91   | 1377.3 | 1315.6 | 0.02  |

1. Numbers may not add up to 100% due to missing.

Table S3. Characteristics of childhood cancer survivors by quintiles of DASH in the St. Jude Lifetime Cohort Study

|                                        | Men  |      |      | Women |      |      |
|----------------------------------------|------|------|------|-------|------|------|
|                                        | Q1   | Q3   | Q5   | Q1    | Q3   | Q5   |
| Median                                 | 26   | 38   | 50   | 27    | 38   | 50   |
| N                                      | 449  | 393  | 264  | 256   | 313  | 443  |
| Age, years(mean)                       | 30.7 | 30.3 | 31.6 | 29.1  | 29.4 | 31.0 |
| Race/Ethnicity (%)                     |      |      |      |       |      |      |
| White-non-Hispanic                     | 80.2 | 84.7 | 88.3 | 70.3  | 79.6 | 86.5 |
| Black-non-Hispanic                     | 16.5 | 10.9 | 6.1  | 28.1  | 15.7 | 7.2  |
| Others                                 | 3.3  | 4.3  | 5.7  | 1.6   | 4.8  | 6.3  |
| Education <sup>1</sup> (%)             |      |      |      |       |      |      |
| Less than high school                  | 12.9 | 8.7  | 6.8  | 17.2  | 5.4  | 2.0  |
| High school graduate.                  | 26.9 | 17.6 | 10.6 | 22.3  | 14.4 | 9.7  |
| Training after high school             | 34.7 | 33.1 | 26.1 | 35.9  | 39.0 | 29.8 |
| College or post-graduate               | 15.6 | 31.6 | 48.9 | 16.8  | 33.2 | 49.7 |
| Other                                  | 2.4  | 3.1  | 2.3  | 1.6   | 2.9  | 3.8  |
| Smoking <sup>1</sup> (%)               |      |      |      |       |      |      |
| Never                                  | 52.8 | 71.0 | 80.7 | 61.3  | 75.4 | 77.0 |
| Former                                 | 10.5 | 10.9 | 4.5  | 4.7   | 3.2  | 5.0  |
| Current                                | 24.7 | 10.2 | 7.2  | 27.0  | 15.7 | 8.8  |
| Alcohol, drinks/day (%)                |      |      |      |       |      |      |
| 0                                      | 22.5 | 21.4 | 21.2 | 28.5  | 22.7 | 14.0 |
| <0.5                                   | 44.5 | 43.8 | 43.6 | 53.9  | 53.4 | 58.0 |
| 0.5 - <1                               | 9.4  | 10.4 | 9.8  | 7.8   | 12.1 | 15.1 |
| 1 - <2                                 | 13.1 | 15.0 | 14.0 | 5.1   | 6.7  | 7.9  |
| 2+                                     | 10.5 | 9.4  | 11.4 | 4.7   | 5.1  | 5.0  |
| Body mass index, kg/m <sup>2</sup> (%) |      |      |      |       |      |      |
| <18.5                                  | 4.0  | 2.0  | 1.1  | 9.4   | 5.8  | 4.1  |
| 18.5 - <25                             | 38.1 | 29.0 | 34.8 | 35.2  | 38.0 | 43.6 |
| 25 - <30                               | 25.2 | 36.6 | 36.4 | 21.5  | 23.6 | 23.5 |
| 30+                                    | 32.7 | 32.3 | 27.7 | 34.0  | 32.6 | 28.9 |

|                               |        |        |        |        |        |        |
|-------------------------------|--------|--------|--------|--------|--------|--------|
| No physical activities (%)    | 23.8   | 12.7   | 8.0    | 32.0   | 18.2   | 10.8   |
| Multivitamin use (%)          | 15.6   | 26.2   | 37.5   | 10.9   | 24.9   | 39.3   |
| Single supplement use (%)     | 22.7   | 38.7   | 56.1   | 21.1   | 40.6   | 55.1   |
| Hypertension (%)              | 10.7   | 8.9    | 9.8    | 7.8    | 11.8   | 7.7    |
| High cholesterol (%)          | 5.8    | 7.4    | 8.3    | 4.3    | 4.5    | 6.8    |
| Diabetes (%)                  | 2.4    | 4.6    | 4.2    | 2.0    | 2.9    | 4.5    |
| Cancer treatment              |        |        |        |        |        |        |
| Chest radiation (%)           | 26.5   | 24.2   | 24.2   | 22.7   | 29.1   | 23.3   |
| Alkylating agent (%)          | 61.5   | 65.1   | 62.1   | 64.8   | 62.9   | 59.4   |
| Anthracycline (%)             | 57.7   | 58.8   | 57.2   | 64.1   | 56.9   | 55.3   |
| Platinum (%)                  | 14.3   | 14.2   | 10.6   | 15.6   | 16.9   | 11.7   |
| Cancer group (%)              |        |        |        |        |        |        |
| Central nervous system tumors | 13.8   | 17.6   | 13.3   | 8.6    | 16.0   | 8.6    |
| Leukemia                      | 31.6   | 36.1   | 37.9   | 35.9   | 32.3   | 38.1   |
| Lymphoma                      | 18.9   | 19.8   | 23.9   | 19.9   | 16.3   | 18.1   |
| Wilms tumor                   | 7.6    | 4.3    | 1.9    | 6.3    | 6.4    | 8.4    |
| Other                         | 28.1   | 22.1   | 23.1   | 29.3   | 29.1   | 26.9   |
| Nutrient intake               |        |        |        |        |        |        |
| Total fat (% of total energy) | 37.1   | 37.3   | 33.4   | 36.8   | 37.5   | 33.6   |
| Vitamin C (mg/1,000 kcal)     | 61.3   | 90.7   | 164.9  | 70.8   | 115.5  | 219.6  |
| Dietary fiber (g/1,000 kcal)  | 5.4    | 7.7    | 11.6   | 5.9    | 8.3    | 12.8   |
| Calcium (g/1,000 kcal)        | 355.0  | 418.0  | 537.9  | 322.9  | 433.2  | 553.7  |
| Total sugar (g/1,000 kcal)    | 67.2   | 55.0   | 57.8   | 72.7   | 58.0   | 60.9   |
| Sodium (mg/1,000 kcal)        | 1558.1 | 1688.6 | 1716.9 | 1533.5 | 1662.3 | 1699.2 |
| Potassium (mg/1,000 kcal)     | 1022.7 | 1258.9 | 1636.7 | 1007.9 | 1283.6 | 1741.2 |

---

1. Numbers may not add up to 100% due to missing.

Table S4. Characteristics of childhood cancer survivors by tertiles of Mediterranean Diet in the St. Jude Lifetime Cohort Study

|                                        | Men  |      |      | Women |      |      |
|----------------------------------------|------|------|------|-------|------|------|
|                                        | T1   | T2   | T3   | T1    | T2   | T3   |
| Median                                 | 2    | 5    | 6    | 2     | 4    | 7    |
| N                                      | 689  | 655  | 538  | 643   | 567  | 433  |
| Age, years(mean)                       | 30.0 | 30.5 | 31.4 | 28.7  | 30.3 | 31.9 |
| Race/Ethnicity (%)                     |      |      |      |       |      |      |
| White-non-Hispanic                     | 83.2 | 83.5 | 83.8 | 77.6  | 81.7 | 82.9 |
| Black-non-Hispanic                     | 12.6 | 12.7 | 10.6 | 20.2  | 13.1 | 10.9 |
| Others                                 | 4.2  | 3.8  | 5.6  | 2.2   | 5.3  | 6.2  |
| Education <sup>1</sup> (%)             |      |      |      |       |      |      |
| Less than high school                  | 13.4 | 9.9  | 5.0  | 11.5  | 5.5  | 3.5  |
| High school graduate.                  | 27.1 | 19.8 | 10.6 | 22.4  | 16.4 | 7.9  |
| Training after high school             | 34.1 | 33.4 | 30.5 | 35.8  | 30.9 | 31.2 |
| College or post-graduate               | 15.4 | 26.1 | 45.7 | 22.4  | 39.3 | 50.1 |
| Other                                  | 2.5  | 4.1  | 2.8  | 2.5   | 2.3  | 4.2  |
| Smoking <sup>1</sup> (%)               |      |      |      |       |      |      |
| Never                                  | 58.6 | 65.8 | 74.0 | 69.2  | 74.3 | 76.4 |
| Former                                 | 10.0 | 9.8  | 8.0  | 4.5   | 4.6  | 5.1  |
| Current                                | 20.9 | 14.0 | 8.4  | 20.2  | 13.4 | 9.5  |
| Alcohol, drinks/day (%)                |      |      |      |       |      |      |
| 0                                      | 26.9 | 20.5 | 15.4 | 28.0  | 20.6 | 10.9 |
| <0.5                                   | 47.3 | 43.5 | 40.1 | 56.9  | 55.0 | 56.6 |
| 0.5 - <1                               | 6.1  | 13.0 | 15.1 | 5.0   | 11.3 | 21.0 |
| 1 - <2                                 | 8.0  | 13.1 | 16.7 | 5.3   | 7.2  | 7.4  |
| 2+                                     | 11.8 | 9.9  | 12.6 | 4.8   | 5.8  | 4.2  |
| Body mass index, kg/m <sup>2</sup> (%) |      |      |      |       |      |      |
| <18.5                                  | 3.3  | 2.6  | 1.5  | 5.3   | 5.1  | 4.4  |
| 18.5 - <25                             | 32.7 | 28.7 | 32.7 | 35.3  | 36.5 | 43.6 |
| 25 - <30                               | 27.6 | 35.1 | 35.5 | 22.4  | 24.3 | 24.5 |
| 30+                                    | 36.4 | 33.6 | 30.3 | 37.0  | 34.0 | 27.5 |



|                               |        |        |        |        |        |        |
|-------------------------------|--------|--------|--------|--------|--------|--------|
| No physical activities (%)    | 21.8   | 14.5   | 10.8   | 26.6   | 17.5   | 10.2   |
| Multivitamin use (%)          | 17.1   | 24.4   | 33.3   | 18.0   | 26.1   | 38.6   |
| Single supplement use (%)     | 26.1   | 36.0   | 49.1   | 29.2   | 42.2   | 56.6   |
| Hypertension (%)              | 8.7    | 9.8    | 8.2    | 10.3   | 9.9    | 8.1    |
| High cholesterol (%)          | 5.4    | 7.0    | 5.8    | 4.0    | 3.9    | 7.4    |
| Diabetes (%)                  | 2.5    | 4.0    | 2.8    | 2.8    | 3.7    | 3.9    |
| Cancer treatment              |        |        |        |        |        |        |
| Chest radiation (%)           | 25.4   | 24.0   | 23.6   | 19.4   | 24.2   | 26.3   |
| Alkylating agent (%)          | 64.9   | 64.0   | 64.1   | 59.4   | 63.0   | 57.7   |
| Anthracycline (%)             | 57.3   | 57.3   | 59.7   | 61.3   | 54.9   | 55.4   |
| Platinum (%)                  | 15.5   | 13.6   | 12.6   | 14.5   | 14.3   | 10.9   |
| Cancer group (%)              |        |        |        |        |        |        |
| Central nervous system tumors | 16.1   | 15.7   | 13.9   | 12.8   | 11.6   | 10.2   |
| Leukemia                      | 33.4   | 35.3   | 33.1   | 38.7   | 36.7   | 33.3   |
| Lymphoma                      | 19.6   | 18.2   | 23.4   | 14.5   | 14.8   | 21.9   |
| Wilms tumor                   | 5.7    | 4.4    | 3.2    | 7.6    | 6.9    | 8.1    |
| Other                         | 25.3   | 26.4   | 26.4   | 26.4   | 30.0   | 26.6   |
| Nutrient intake               |        |        |        |        |        |        |
| Total fat (% of total energy) | 37.3   | 36.6   | 35.9   | 37.1   | 36.4   | 35.4   |
| Vitamin C (mg/1,000 kcal)     | 67.1   | 95.6   | 137.8  | 89.4   | 143.2  | 205.2  |
| Dietary fiber (g/1,000 kcal)  | 5.9    | 7.7    | 9.9    | 6.9    | 9.5    | 12.4   |
| Calcium (g/1,000 kcal)        | 405.3  | 424.6  | 441.3  | 416.4  | 456.9  | 487.3  |
| Total sugar (g/1,000 kcal)    | 61.4   | 58.6   | 55.2   | 64.3   | 59.8   | 57.0   |
| Sodium (mg/1,000 kcal)        | 1617.3 | 1657.3 | 1702.2 | 1612.9 | 1665.2 | 1720.6 |
| Potassium (mg/1,000 kcal)     | 1097.3 | 1257.8 | 1448.8 | 1150.4 | 1400.0 | 1654.3 |

---

1. Numbers may not add up to 100% due to missing.

Figure S2. Non-parametric regression curves<sup>1</sup> for associations between DASH and risk of CVD in St. Jude Lifetime Cohort Study

A. Men

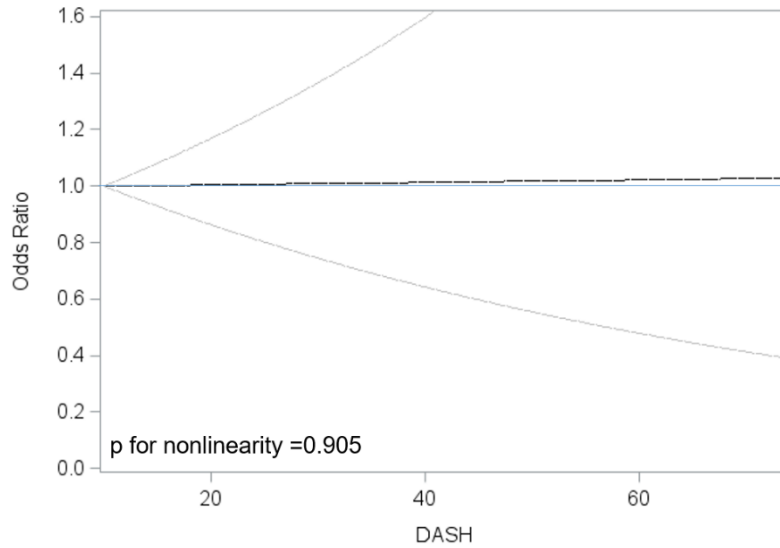

B. Women

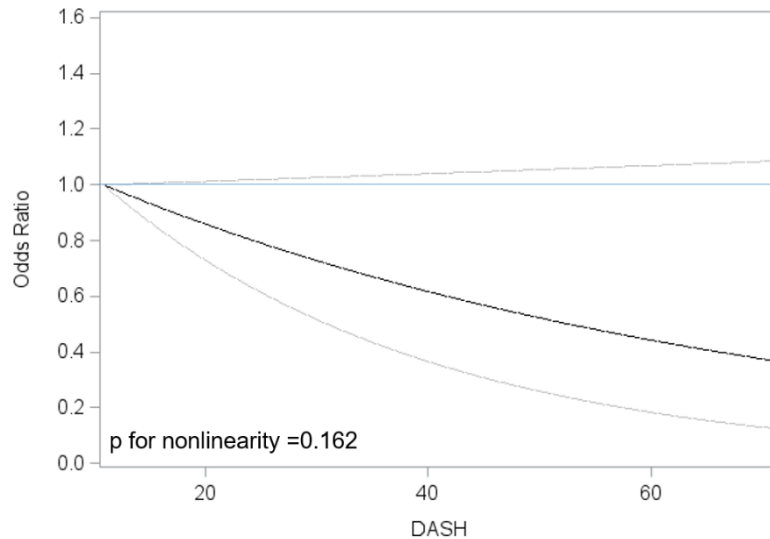

1. Adjusted for age; race (non-Hispanic white, non-Hispanic black, and Hispanic or other); education (less than high school, high school graduation, training after high school, and college or post-grad); smoking (never, former, and current); alcohol (0, 0-0.49, 0.5-0.99, 1-1.99, and 2+ drinks/day); BMI (underweight, normal, overweight, and obese); no physical activity (yes and no); multivitamin use (yes and no); single supplement use (yes and no); history of diabetes (yes and no); history of hypertension (yes and no); history of high cholesterol (yes and no); and cancer treatment receiving anthracycline (yes and no); alkylating agents (yes and no); platinum based agents (yes and no); and chest radiation (yes and no).

Figure S3. Non-parametric regression curves<sup>1</sup> for associations between Mediterranean diet and risk of CVD in St. Jude Lifetime Cohort Study

A. Men

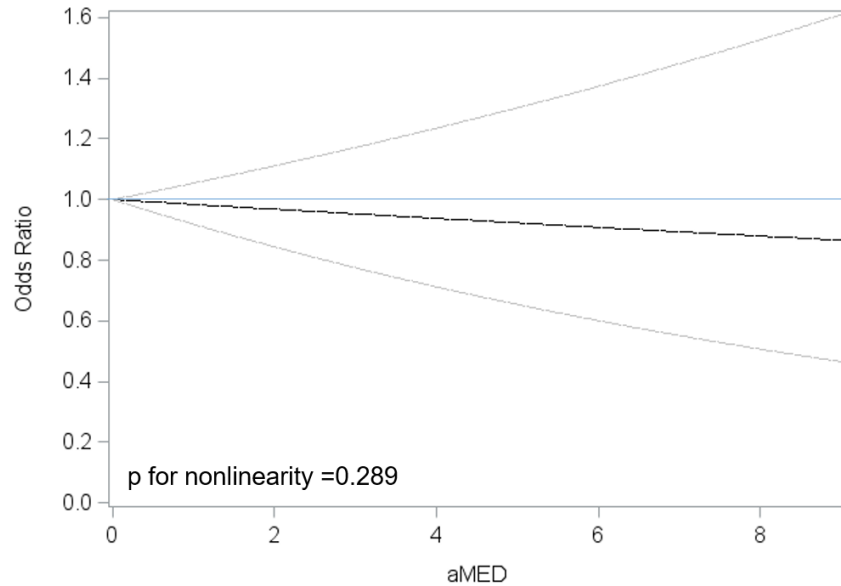

B. Women

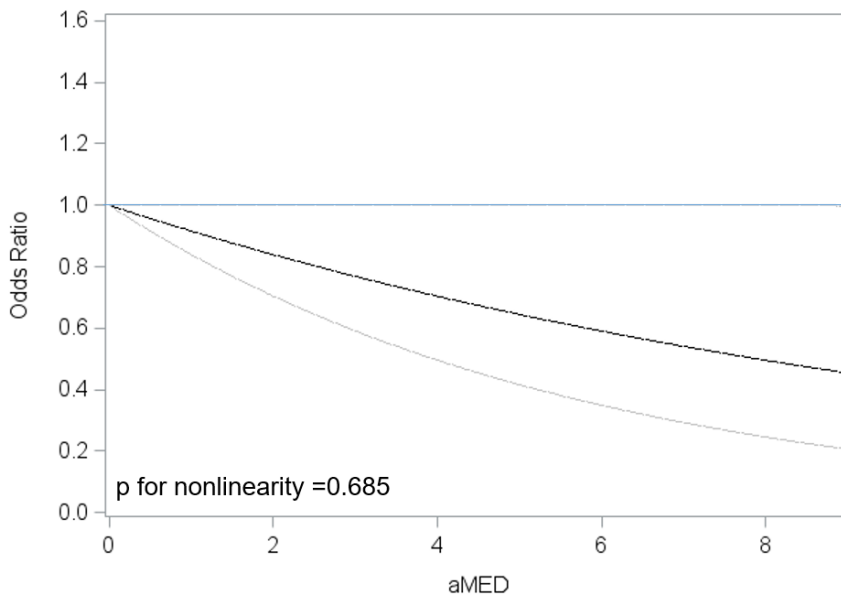

1. Adjusted for age; race (non-Hispanic white, non-Hispanic black, and Hispanic or other); education (less than high school, high school graduation, training after high school, and college or post-grad); smoking (never, former, and current); alcohol (0, 0-0.49, 0.5-0.99, 1-1.99, and 2+ drinks/day); BMI (underweight, normal, overweight, and obese); no physical activity (yes and no); multivitamin use (yes and no); single supplement use (yes and no); history of diabetes (yes and no); history of hypertension (yes and no); history of high cholesterol (yes and no); and cancer treatment receiving anthracycline (yes and no); alkylating agents (yes and no); platinum based agents (yes and no); and chest radiation (yes and no)
